# Supplementary material for: Coordination-induced spontaneous resolution of a TPPE-based MOF and its use as a crystalline sponge in guest determination
Source: Royal Society of Chemistry journal article supplement (doi:10.1039/d1dt00928a), 2021-01-01

# **Coordination-induced spontaneous resolution of a TPPE-based MOF and its use as crystalline sponge for guest determination**

Ruoyu Cui,<sup>a</sup> Helin Niu,<sup>b</sup> and Enhong Sheng<sup>\*a</sup>

---

<sup>a</sup>Department of Chemistry, Anhui Normal University, Wuhu 241000, P. R. China.

<sup>b</sup>Department of Chemistry, Anhui University, Hefei 230039, P. R. China

E-mail: shengeh@mail.ahnu.edu.cn

## **Table of Content**

1. Materials and general procedures
2. Synthesis
3. Tables S1-S3. Crystal data and structure refinement
4. Figures S1-S4. Additional X-ray crystallographic structures
5. Table S4. Structure refinement parameters of individual crystals
6. Figure S5. PXRD patterns
7. Figure S6. IR spectra
8. Figure S7. TGA curves
9. Figure S8. CD spectra

## 1. Materials and General Procedures

All the chemicals are commercially available, and used without further purification. The IR (KBr pellet) spectra were recorded (400-4000  $\text{cm}^{-1}$  region) on a Nicolet Magna 750 FT-IR spectrometer. The CD spectra were recorded on a J-800 spectropolarimeter (Jasco, Japan). Thermogravimetric analyses (TGA) were carried out in an  $\text{N}_2$  atmosphere with a heating rate of 10  $^\circ\text{C}/\text{min}$  on a STA449C integration thermal analyzer. Powder X-ray diffraction (PXRD) data were collected on a Bruker D8 Advance diffractometer using  $\text{Cu K}\alpha$  radiation. The calculated PXRD patterns were produced using the SHELXTL-XPOW program and single crystal reflection data.  $\text{CO}_2$  adsorption isotherms were measured using a Micromeritics ASAP 2020 surface area analyzer at 195 K. Before the adsorption measurement, the samples were exchanged with acetone for 4 times (6 h for each time) and then degassed on ASAP 2020 for 10 h at 60  $^\circ\text{C}$ .

**X-ray Crystallography.** All the single-crystal XRD data were collected on a Bruker SMART Apex II CCD-based X-ray diffractometer with  $\text{Mo-K}\alpha$  radiation ( $\lambda = 0.71073 \text{ \AA}$ ) at 298 K. The empirical absorption correction was applied by using the SADABS program (G. M. Sheldrick, SADABS, program for empirical absorption correction of area detector data; University of Göttingen, Göttingen, Germany, 1996). The structures were solved using direct method, and refined by full-matrix least-squares on  $F^2$  by the SHELXTL-2014 software package. Crystal data and details of the data collection are given in **Tables S1-S3**. CCDC 2071852-2071865 contain the supplementary crystallographic data for this paper. The data can be obtained free of charge from The Cambridge Crystallographic Data Centre via [www.ccdc.cam.ac.uk/data\\_request/cif](http://www.ccdc.cam.ac.uk/data_request/cif).

## 2. Synthesis

The TPPE ligand was synthesized according to the reported procedures (*J. Am. Chem. Soc.* **2015**, *137*, 16209–16215)

**2.1 Synthesis of 1:** A mixture of  $\text{Co}(\text{NO}_3)_2 \cdot 6\text{H}_2\text{O}$  (15.0 mg, 0.05 mmol), TPPE (31.4 mg, 0.05 mmol), DMF (3 mL), EtOH (0.75 mL) and 10 drops of HCl aqueous solution ( $v/v = 1/10$ ) in a capped vial were heated at 100  $^\circ\text{C}$  for 6 hours. Saffron yellow crystals of **1** (89% yield) were filtered, washed with EtOH and  $\text{Et}_2\text{O}$  respectively, and dried at room temperature.

**2.2 Synthesis of host-guest structures:** Fresh prepared crystals of **1** were exchanged thoroughly with anhydrous acetone and then evacuated at 60  $^\circ\text{C}$  for 2 hours. The guest-free crystals of **1** were immersed into  $\text{H}_2\text{O}$  and anhydrous DMF, EtOH, Acetone, 2-butanol, and 2-butylamine respectively for at least 24 hours.

## 3. Table S1. Crystal data and structure refinement

| Identification Code         | <b>1M</b>                                                     | <b>1P</b>                                                     | <b>Evacuated 1P</b>                                 |
|-----------------------------|---------------------------------------------------------------|---------------------------------------------------------------|-----------------------------------------------------|
| Empirical formula           | $\text{C}_{58}\text{H}_{60}\text{Cl}_2\text{CoN}_8\text{O}_4$ | $\text{C}_{58}\text{H}_{60}\text{Cl}_2\text{CoN}_8\text{O}_4$ | $\text{C}_{46}\text{H}_{32}\text{Cl}_2\text{CoN}_4$ |
| Formula weight              | 1062.97                                                       | 1062.97                                                       | 770.58                                              |
| Temperature (K)             | 298.0                                                         | 298.0                                                         | 298.0                                               |
| Wavelength ( $\text{\AA}$ ) | 0.71073                                                       | 0.71073                                                       | 0.71073                                             |
| Crystal system              | Orthorhombic                                                  | Orthorhombic                                                  | Orthorhombic                                        |
| Space group                 | <i>I</i> 222                                                  | <i>I</i> 222                                                  | <i>I</i> 222                                        |

|                                                     |                                                                                                                                                      |                                                                                                                                                      |                                                                                                                                                         |
|-----------------------------------------------------|------------------------------------------------------------------------------------------------------------------------------------------------------|------------------------------------------------------------------------------------------------------------------------------------------------------|---------------------------------------------------------------------------------------------------------------------------------------------------------|
| Unit cell dimensions                                | $a = 11.903(5) \text{ \AA}$ $\alpha = 90^\circ$<br>$b = 14.551(5) \text{ \AA}$ $\beta = 90^\circ$<br>$c = 17.057(5) \text{ \AA}$ $\gamma = 90^\circ$ | $a = 11.710(5) \text{ \AA}$ $\alpha = 90^\circ$<br>$b = 14.344(5) \text{ \AA}$ $\beta = 90^\circ$<br>$c = 17.216(5) \text{ \AA}$ $\gamma = 90^\circ$ | $a = 11.969(14) \text{ \AA}$ $\alpha = 90^\circ$<br>$b = 14.578(16) \text{ \AA}$ $\beta = 90^\circ$<br>$c = 17.092(20) \text{ \AA}$ $\gamma = 90^\circ$ |
| Volume ( $\text{\AA}^3$ ), $Z$                      | 2954.3(18), 2                                                                                                                                        | 2891.7(18), 2                                                                                                                                        | 2982(6), 2                                                                                                                                              |
| Density (calculated) (mg/m <sup>3</sup> )           | 1.195                                                                                                                                                | 1.221                                                                                                                                                | 0.858                                                                                                                                                   |
| Absorption coefficient (mm <sup>-1</sup> )          | 0.430                                                                                                                                                | 0.440                                                                                                                                                | 0.402                                                                                                                                                   |
| $F(000)$                                            | 1114                                                                                                                                                 | 1114                                                                                                                                                 | 794                                                                                                                                                     |
| Reflections collected / unique                      | 7396 / 3397                                                                                                                                          | 7382 / 3263                                                                                                                                          | 5381 / 3288                                                                                                                                             |
| Completeness to theta                               | 25.240, 99.7%                                                                                                                                        | 25.240, 98.9%                                                                                                                                        | 25.242, 99.4%                                                                                                                                           |
| $R_{int}$                                           | 0.0315                                                                                                                                               | 0.0351                                                                                                                                               | 0.0454                                                                                                                                                  |
| Refinement method                                   | Full-matrix least-squares on $F^2$                                                                                                                   | Full-matrix least-squares on $F^2$                                                                                                                   | Full-matrix least-squares on $F^2$                                                                                                                      |
| Data / restraints / parameters                      | 3397 / 12 / 145                                                                                                                                      | 3263 / 16 / 145                                                                                                                                      | 3288 / 0 / 122                                                                                                                                          |
| Goodness-of-fit on $F^2$                            | 0.953                                                                                                                                                | 1.154                                                                                                                                                | 0.916                                                                                                                                                   |
| Final $R$ indices [ $I > 2\sigma(I)$ ]              | $R_1 = 0.0628$ , $wR_2 = 0.1807$                                                                                                                     | $R_1 = 0.0650$ , $wR_2 = 0.1846$                                                                                                                     | $R_1 = 0.0450$ , $wR_2 = 0.1200$                                                                                                                        |
| $R$ indices (all data)                              | $R_1 = 0.0771$ , $wR_2 = 0.1990$                                                                                                                     | $R_1 = 0.0779$ , $wR_2 = 0.1960$                                                                                                                     | $R_1 = 0.0635$ , $wR_2 = 0.1309$                                                                                                                        |
| Absolute structure parameter                        | 0.048(15)                                                                                                                                            | 0.051(16)                                                                                                                                            | 0.08(2)                                                                                                                                                 |
| Largest diff. peak and hole (e. $\text{\AA}^{-3}$ ) | 0.837 and -0.717                                                                                                                                     | 1.038 and -1.028                                                                                                                                     | 0.533 and -0.275                                                                                                                                        |

**Table S2. Crystal data and structure refinement**

| Identification Code            | <b>1M-DMF</b>                                                                                                                                        | <b>1P-H<sub>2</sub>O</b>                                                                                                                             | <b>1P-EtOH</b>                                                                                                                                       |
|--------------------------------|------------------------------------------------------------------------------------------------------------------------------------------------------|------------------------------------------------------------------------------------------------------------------------------------------------------|------------------------------------------------------------------------------------------------------------------------------------------------------|
| Empirical formula              | C <sub>58</sub> H <sub>60</sub> Cl <sub>2</sub> Co N <sub>8</sub> O <sub>4</sub>                                                                     | C <sub>46</sub> H <sub>40</sub> Cl <sub>2</sub> Co N <sub>4</sub> O <sub>4</sub>                                                                     | C <sub>54</sub> H <sub>56</sub> Cl <sub>2</sub> Co N <sub>4</sub> O <sub>4</sub>                                                                     |
| Formula weight                 | 1062.97                                                                                                                                              | 842.65                                                                                                                                               | 954.85                                                                                                                                               |
| Temperature (K)                | 298.0                                                                                                                                                | 298.0                                                                                                                                                | 298.0                                                                                                                                                |
| Wavelength ( $\text{\AA}$ )    | 0.71073                                                                                                                                              | 0.71073                                                                                                                                              | 0.71073                                                                                                                                              |
| Crystal system                 | Orthorhombic                                                                                                                                         | Orthorhombic                                                                                                                                         | Orthorhombic                                                                                                                                         |
| Space group                    | $I222$                                                                                                                                               | $I222$                                                                                                                                               | $I222$                                                                                                                                               |
| Unit cell dimensions           | $a = 11.907(3) \text{ \AA}$ $\alpha = 90^\circ$<br>$b = 14.568(3) \text{ \AA}$ $\beta = 90^\circ$<br>$c = 16.881(4) \text{ \AA}$ $\gamma = 90^\circ$ | $a = 11.926(5) \text{ \AA}$ $\alpha = 90^\circ$<br>$b = 14.364(5) \text{ \AA}$ $\beta = 90^\circ$<br>$c = 17.229(5) \text{ \AA}$ $\gamma = 90^\circ$ | $a = 12.234(5) \text{ \AA}$ $\alpha = 90^\circ$<br>$b = 14.694(5) \text{ \AA}$ $\beta = 90^\circ$<br>$c = 16.978(5) \text{ \AA}$ $\gamma = 90^\circ$ |
| Volume ( $\text{\AA}^3$ ), $Z$ | 2928.1(11), 2                                                                                                                                        | 2951(2), 2                                                                                                                                           | 3052.1(19), 2                                                                                                                                        |

|                                                     |                                                                 |                                                                 |                                                                 |
|-----------------------------------------------------|-----------------------------------------------------------------|-----------------------------------------------------------------|-----------------------------------------------------------------|
| Density (calculated) (mg/m <sup>3</sup> )           | 1.206                                                           | 0.948                                                           | 1.039                                                           |
| Absorption coefficient (mm <sup>-1</sup> )          | 0.434                                                           | 0.415                                                           | 0.408                                                           |
| <i>F</i> (000)                                      | 1114                                                            | 874                                                             | 1002                                                            |
| Reflections collected / unique                      | 7324 / 3350                                                     | 11691 / 3444                                                    | 7970 / 3533                                                     |
| Completeness to theta                               | 25.242, 98.8%                                                   | 25.242, 99.9%                                                   | 25.240, 99.1%                                                   |
| <i>R</i> <sub>int</sub>                             | 0.0369                                                          | 0.0978                                                          | 0.0570                                                          |
| Refinement method                                   | Full-matrix least-squares on <i>F</i> <sup>2</sup>              | Full-matrix least-squares on <i>F</i> <sup>2</sup>              | Full-matrix least-squares on <i>F</i> <sup>2</sup>              |
| Data / restraints / parameters                      | 3350 / 34 / 167                                                 | 3444 / 4 / 131                                                  | 3533 / 3 / 138                                                  |
| Goodness-of-fit on <i>F</i> <sup>2</sup>            | 1.072                                                           | 0.968                                                           | 1.091                                                           |
| Final <i>R</i> indices [ <i>I</i> > 2σ( <i>I</i> )] | <i>R</i> <sub>1</sub> = 0.0596, <i>wR</i> <sub>2</sub> = 0.1683 | <i>R</i> <sub>1</sub> = 0.0749, <i>wR</i> <sub>2</sub> = 0.1974 | <i>R</i> <sub>1</sub> = 0.0845, <i>wR</i> <sub>2</sub> = 0.2357 |
| <i>R</i> indices (all data)                         | <i>R</i> <sub>1</sub> = 0.0846, <i>wR</i> <sub>2</sub> = 0.2031 | <i>R</i> <sub>1</sub> = 0.1293, <i>wR</i> <sub>2</sub> = 0.2261 | <i>R</i> <sub>1</sub> = 0.1351, <i>wR</i> <sub>2</sub> = 0.2692 |
| Absolute structure parameter                        | 0.116(17)                                                       | 0.08(2)                                                         | 0.07(2)                                                         |
| Largest diff. peak and hole (e.Å <sup>-3</sup> )    | 0.602 and -0.469                                                | 2.159 and -0.511                                                | 0.850 and -0.571                                                |

**Table S3. Crystal data and structure refinement**

| Identification Code                        | <b>1P-Acetone</b>                                                                                                       | <b>1P-(S)-2-butanol</b>                                                                                                 | <b>1P-(S)-2-butylamine</b>                                                                                                  |
|--------------------------------------------|-------------------------------------------------------------------------------------------------------------------------|-------------------------------------------------------------------------------------------------------------------------|-----------------------------------------------------------------------------------------------------------------------------|
| Empirical formula                          | C <sub>58</sub> H <sub>56</sub> Cl <sub>2</sub> Co N <sub>4</sub> O <sub>4</sub>                                        | C <sub>62</sub> H <sub>72</sub> Cl <sub>2</sub> Co N <sub>4</sub> O <sub>4</sub>                                        | C <sub>62</sub> H <sub>76</sub> Cl <sub>2</sub> Co N <sub>8</sub>                                                           |
| Formula weight                             | 1002.89                                                                                                                 | 1067.06                                                                                                                 | 1063.13                                                                                                                     |
| Temperature (K)                            | 298.0                                                                                                                   | 298.0                                                                                                                   | 298.0                                                                                                                       |
| Wavelength (Å)                             | 0.71073                                                                                                                 | 0.71073                                                                                                                 | 0.71073                                                                                                                     |
| Crystal system                             | Orthorhombic                                                                                                            | Orthorhombic                                                                                                            | Orthorhombic                                                                                                                |
| Space group                                | <i>I</i> 222                                                                                                            | <i>I</i> 222                                                                                                            | <i>I</i> 222                                                                                                                |
| Unit cell dimensions                       | <i>a</i> = 11.997(4) Å <i>α</i> = 90°<br><i>b</i> = 14.189(5) Å <i>β</i> = 90°<br><i>c</i> = 17.245(5) Å <i>γ</i> = 90° | <i>a</i> = 12.130(5) Å <i>α</i> = 90°<br><i>b</i> = 14.882(7) Å <i>β</i> = 90°<br><i>c</i> = 16.881(7) Å <i>γ</i> = 90° | <i>a</i> = 11.8964(16) Å <i>α</i> = 90°<br><i>b</i> = 14.5101(19) Å <i>β</i> = 90°<br><i>c</i> = 17.098(2) Å <i>γ</i> = 90° |
| Volume (Å <sup>3</sup> ), <i>Z</i>         | 2935.3(16), 2                                                                                                           | 3047(2), 2                                                                                                              | 2951.4(7), 2                                                                                                                |
| Density (calculated) (mg/m <sup>3</sup> )  | 1.135                                                                                                                   | 1.163                                                                                                                   | 1.196                                                                                                                       |
| Absorption coefficient (mm <sup>-1</sup> ) | 0.428                                                                                                                   | 0.416                                                                                                                   | 0.426                                                                                                                       |
| <i>F</i> (000)                             | 1050                                                                                                                    | 1130                                                                                                                    | 1130                                                                                                                        |

|                                                           |                                    |                                    |                                    |
|-----------------------------------------------------------|------------------------------------|------------------------------------|------------------------------------|
| Reflections collected / unique                            | 4618 / 2141                        | 5210 / 2377                        | 6820 / 3363                        |
| Completeness to theta                                     | 23.755, 98.3%                      | 24.191, 98.1%                      | 25.242, 99.8 %                     |
| $R_{int}$                                                 | 0.0388                             | 0.0519                             | 0.0293                             |
| Refinement method                                         | Full-matrix least-squares on $F^2$ | Full-matrix least-squares on $F^2$ | Full-matrix least-squares on $F^2$ |
| Data / restraints / parameters                            | 2141 / 5 / 142                     | 2377 / 9 / 138                     | 3363 / 12 / 142                    |
| Goodness-of-fit on $F^2$                                  | 1.071                              | 1.043                              | 1.065                              |
| Final $R$ indices [ $I > 2\sigma(I)$ ]                    | $R_1 = 0.0516$ , $wR_2 = 0.1405$   | $R_1 = 0.0648$ , $wR_2 = 0.1717$   | $R_1 = 0.0590$ , $wR_2 = 0.1737$   |
| $R$ indices (all data)                                    | $R_1 = 0.0678$ , $wR_2 = 0.1568$   | $R_1 = 0.0944$ , $wR_2 = 0.1924$   | $R_1 = 0.0784$ , $wR_2 = 0.1899$   |
| Absolute structure parameter                              | 0.05(2)                            | 0.06(3)                            | 0.015(14)                          |
| Largest diff. peak and hole ( $e \cdot \text{\AA}^{-3}$ ) | 0.599 and -0.309                   | 0.489 and -0.417                   | 0.833 and -0.420                   |

#### 4. Figures S1-S5. Additional X-ray crystallographic structures

##### 4.1. Figure S1. The asymmetric unit of 1M (left) and 1P(right)

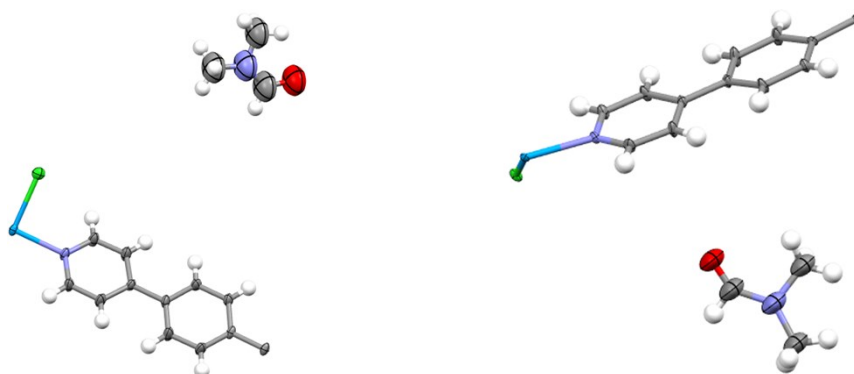

##### 4.2. Figure S2. The 2D sql net (left) and its ABAB stacking to form a 3D supramolecular net (right)

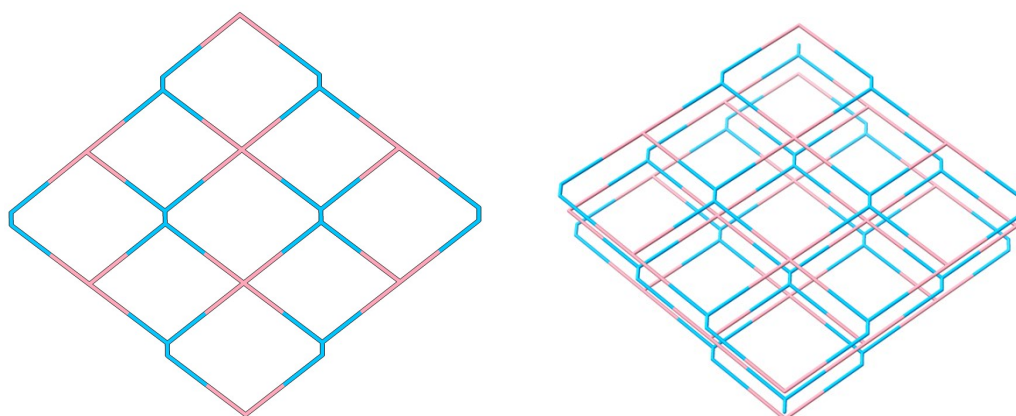

4.3. Figure S3. The unconventional Cl... $\pi$  interaction between the 2D layers

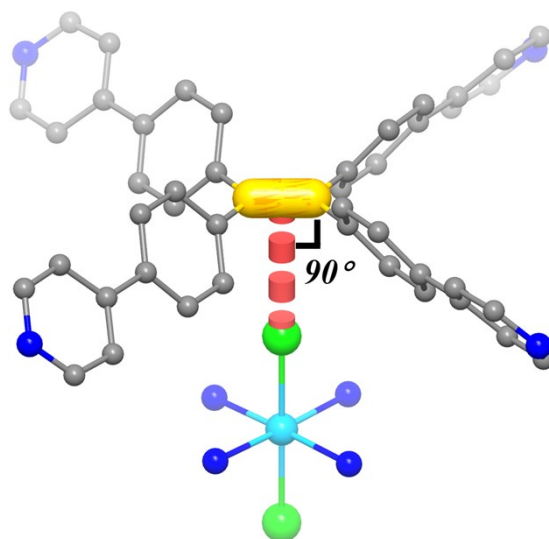

4.4. Figure S4. The host-guest packing structures viewed from the a axis.

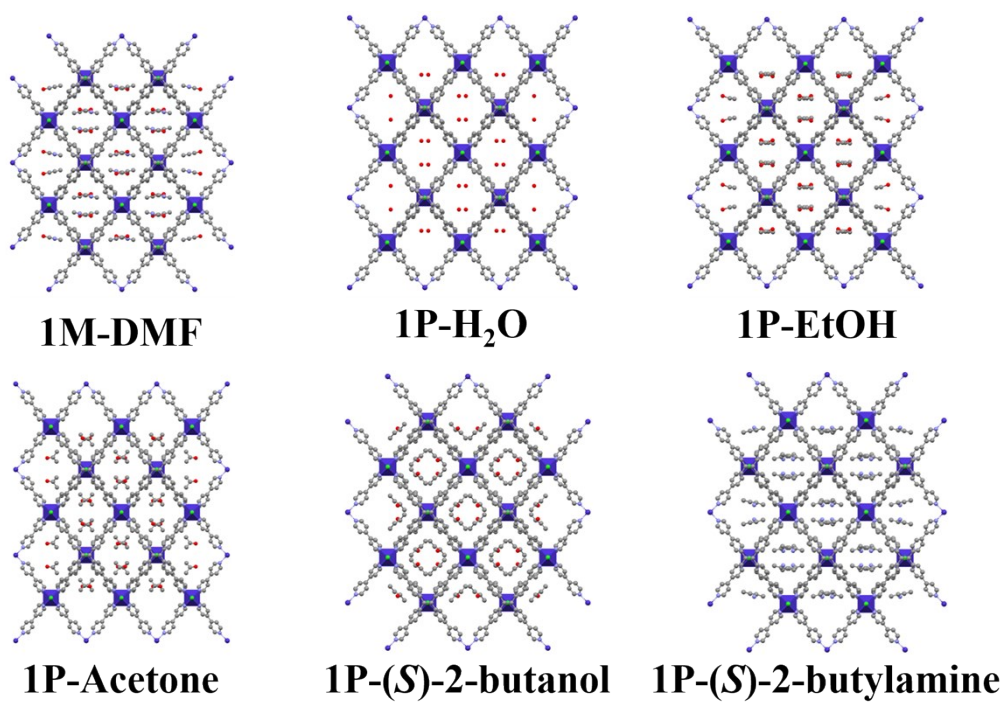

**5. Table S4. The structure refinement parameters for 1 obtained from a statistical experiment to estimate the racemic character of 7 individual single crystals (3  $\Delta$  and 4  $\Lambda$  forms).**

| Form               | $R_{int}$ | $R [I > 2\sigma(I)]$ | $S$   | Flack parameter |
|--------------------|-----------|----------------------|-------|-----------------|
| $\Delta$ (delta)   | 0.0358    | 0.0550               | 1.039 | 0.066(17)       |
| $\Delta$ (delta)   | 0.0314    | 0.0438               | 1.106 | 0.083(13)       |
| $\Delta$ (delta)   | 0.0276    | 0.0430               | 1.024 | 0.048(16)       |
| $\Lambda$ (lambda) | 0.0248    | 0.0416               | 1.117 | 0.048(14)       |
| $\Lambda$ (lambda) | 0.0166    | 0.0393               | 1.157 | 0.069(18)       |
| $\Lambda$ (lambda) | 0.0611    | 0.0575               | 1.032 | 0.08(3)         |
| $\Lambda$ (lambda) | 0.0264    | 0.0361               | 1.018 | 0.047(12)       |

## 6. Figure S5. PXRD patterns

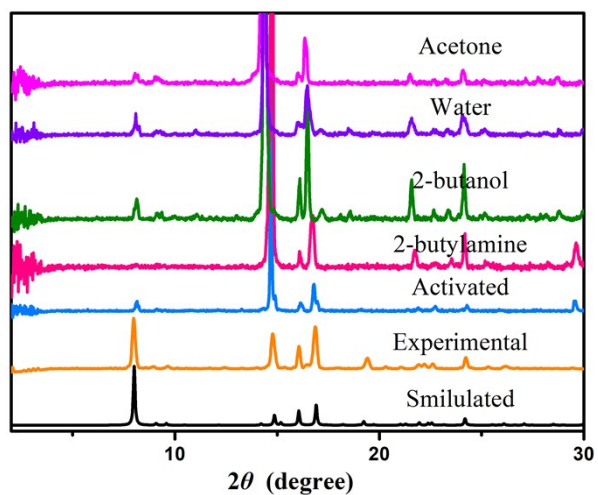

## 7. Figure S6. IR spectra of pristine 1 (up) and guest-loaded materials (bottom)

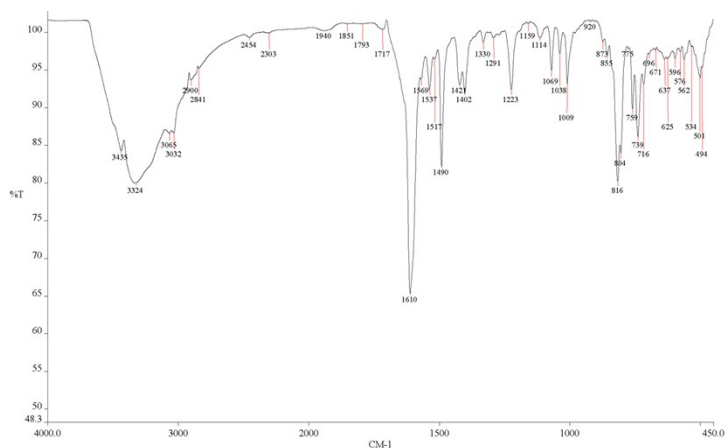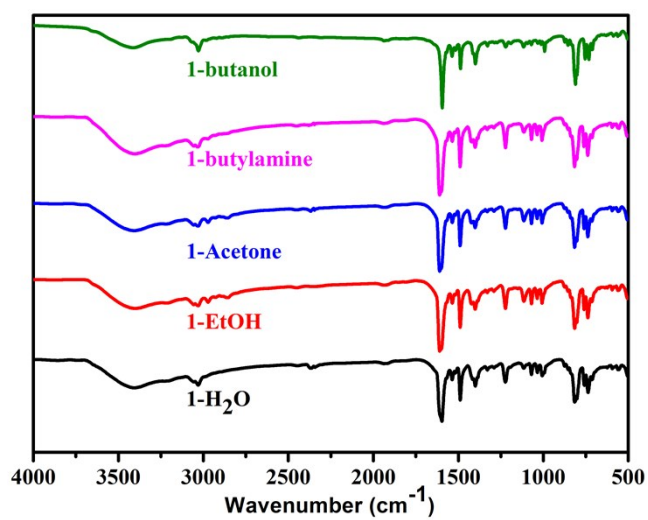



## 8. Figure S7. TGA curves

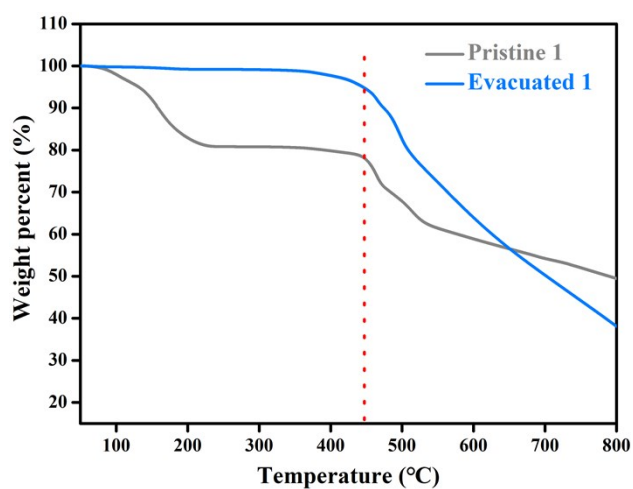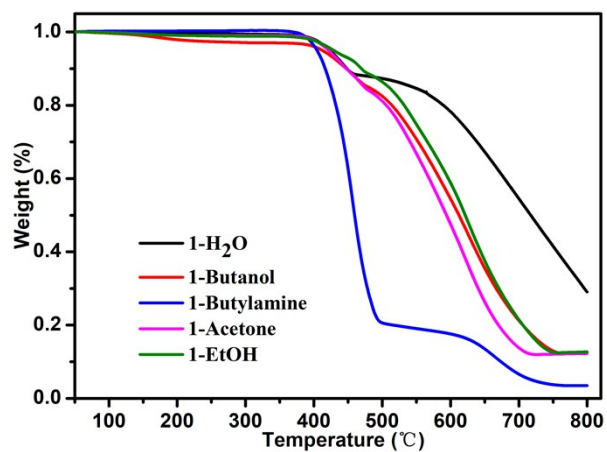

## 9. Figure S8. CD spectra

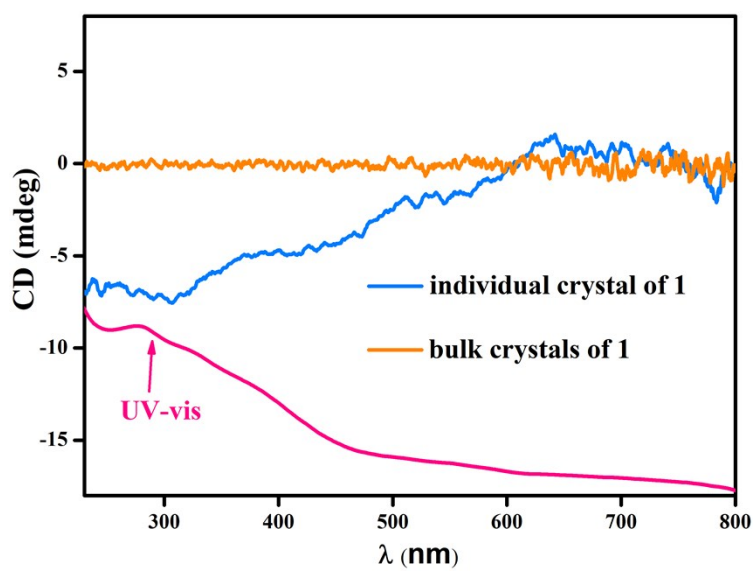

Supplement: d1dt00928a1.pdf [file d1dt00928a1.pdf]
